# Supplementary material for: Pleiotropic roles of Ras GTPases in the nematode-trapping fungus Arthrobotrys oligospora identified through multi-omics analyses
Source: PubMed Central journal article supplement (PMC8313493; doi:10.1016/j.isci.2021.102820), 2021-07-08
Supplement: mmc1.pdf [file mmc1.pdf]

iScience, Volume 24

## Supplemental information

### **Pleiotropic roles of Ras GTPases in the nematode-trapping fungus *Arthrobotrys oligospora* identified through multi-omics analyses**

**Le Yang, Xuemei Li, Meihua Xie, Na Bai, Jiangliu Yang, Kexin Jiang, Ke-Qin Zhang, and Jinkui Yang**



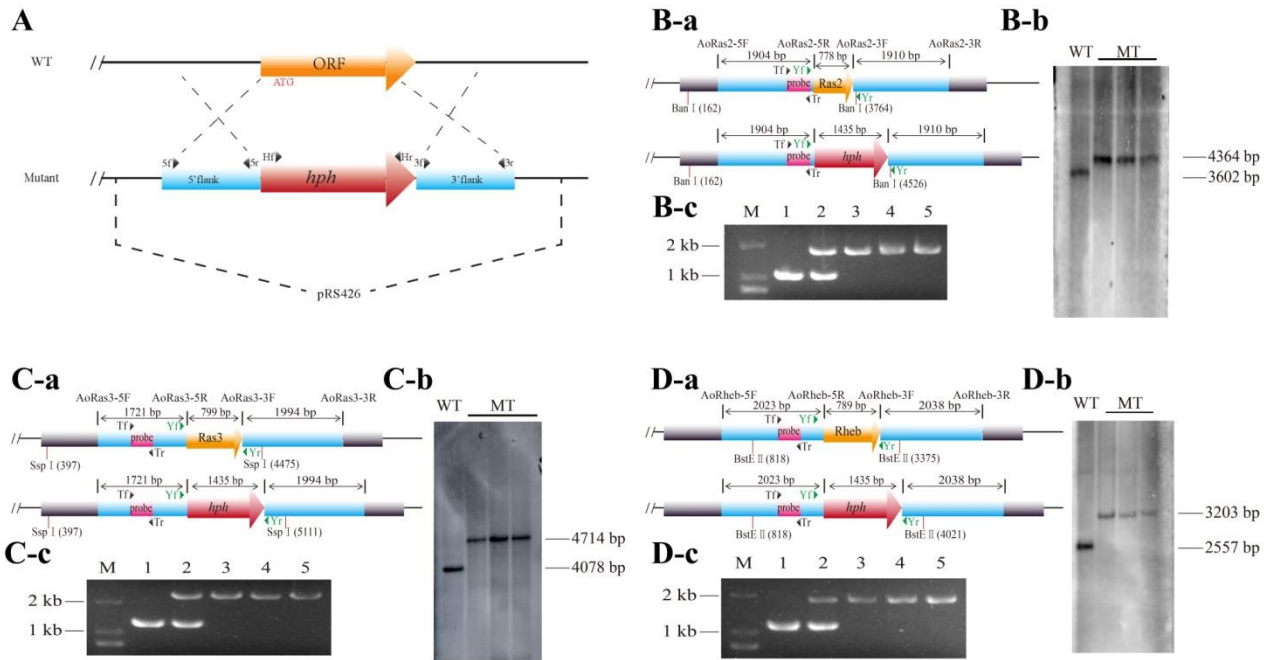

**Figure S2 Verification of the knockdown of Ras GTPase genes in *A. oligospora*. Related to Figure 1.**

(A) Diagrammatic representation of homologous recombination of Ras GTPase genes in *A. oligospora*. (B) Verification of the *Aoras2* gene knockdown using PCR and Southern blot analyses. a. The diagrammatic representation of homologous recombination of the *Aoras2* gene. Primers AoRas2-5f/AoRas2-5r and AoRas2-3f/AoRas2-3r were used for the amplification of homologous flanks of the target gene, and the primers AoRas2-Yf/AoRas2-Yr (Supplementary Table S1) were used for the verification of transformants. *Probe* indicates the site of the Southern blot probe, and *BanI* was the restriction enzyme used for Southern blot analysis. b. The transformants of gene *Aoras2* were verified using PCR with the primers AoRas2-Yf/AoRas2-Yr. Line 3, 4, and 5 suggest positive transformants, line 1 suggests the wild-type (WT) strain, whereas line 2 suggests heterozygotic transformant with a WT gene copy and *hph*-replaced copy. M represents the DNA marker. c. Southern blot analysis of the WT and  $\Delta Aoras2$  mutants. MT represents three independent mutants. (C) Verification of the *Aoras3* gene knockdown using PCR and Southern blot analysis. a. The diagrammatic representation of homologous recombination of the *Aoras3* gene. Primers AoRas3-5f/AoRas3-5r and AoRas3-3f/AoRas3-3r were used for the amplification of homologous flanks of the target gene, and the primers AoRas3-Yf/AoRas3-Yr (Supplementary Table S1) were used for the verification of transformants. *Probe* indicates the site of the Southern blot probe, and *SspI* was the restriction enzyme used for Southern blot analysis. b.

The transformants of gene *Aoras3* were verified using PCR with the primers AoRas3-Yf/AoRas3-Yr. Line 3, 4, and 5 suggest positive transformants, line 1 suggests the wild-type (WT) strain, whereas line 2 suggests heterozygotic transformant with a WT gene copy and *hph*-replaced copy. M represents the DNA marker. c. Southern blot analysis of the WT and  $\Delta Aoras3$  mutants. MT represents three independent mutants. (D) Verification of the *AorheB* gene knockout using PCR and Southern blot analysis. a. The diagrammatic representation of homologous recombination of the *AorheB* gene. Primers AoRheB-5f/AoRheB-5r and AoRheB-3f/ AoRheB-3r were used for the amplification of homologous flanks of the target gene, and the primers AoRheB-Yf/AoRheB-Yr (Supplementary Table S1) were used for the verification of transformants. *Probe* indicates the site of the Southern blot probe, and *BstEII* was the restriction enzyme used for Southern blot analysis. b. The transformants of gene *AorheB* were verified using PCR with the primers AoRheB-Yf/AoRheB-Yr. Line 3, 4, and 5 suggest positive transformants, line 1 suggests the wild-type (WT) strain, whereas line 2 suggests heterozygotic transformant with a WT gene copy and *hph*-replaced copy. M represents the DNA marker. c. Southern blot analysis of the WT and  $\Delta AorheB$  mutants. MT represents three independent mutants.

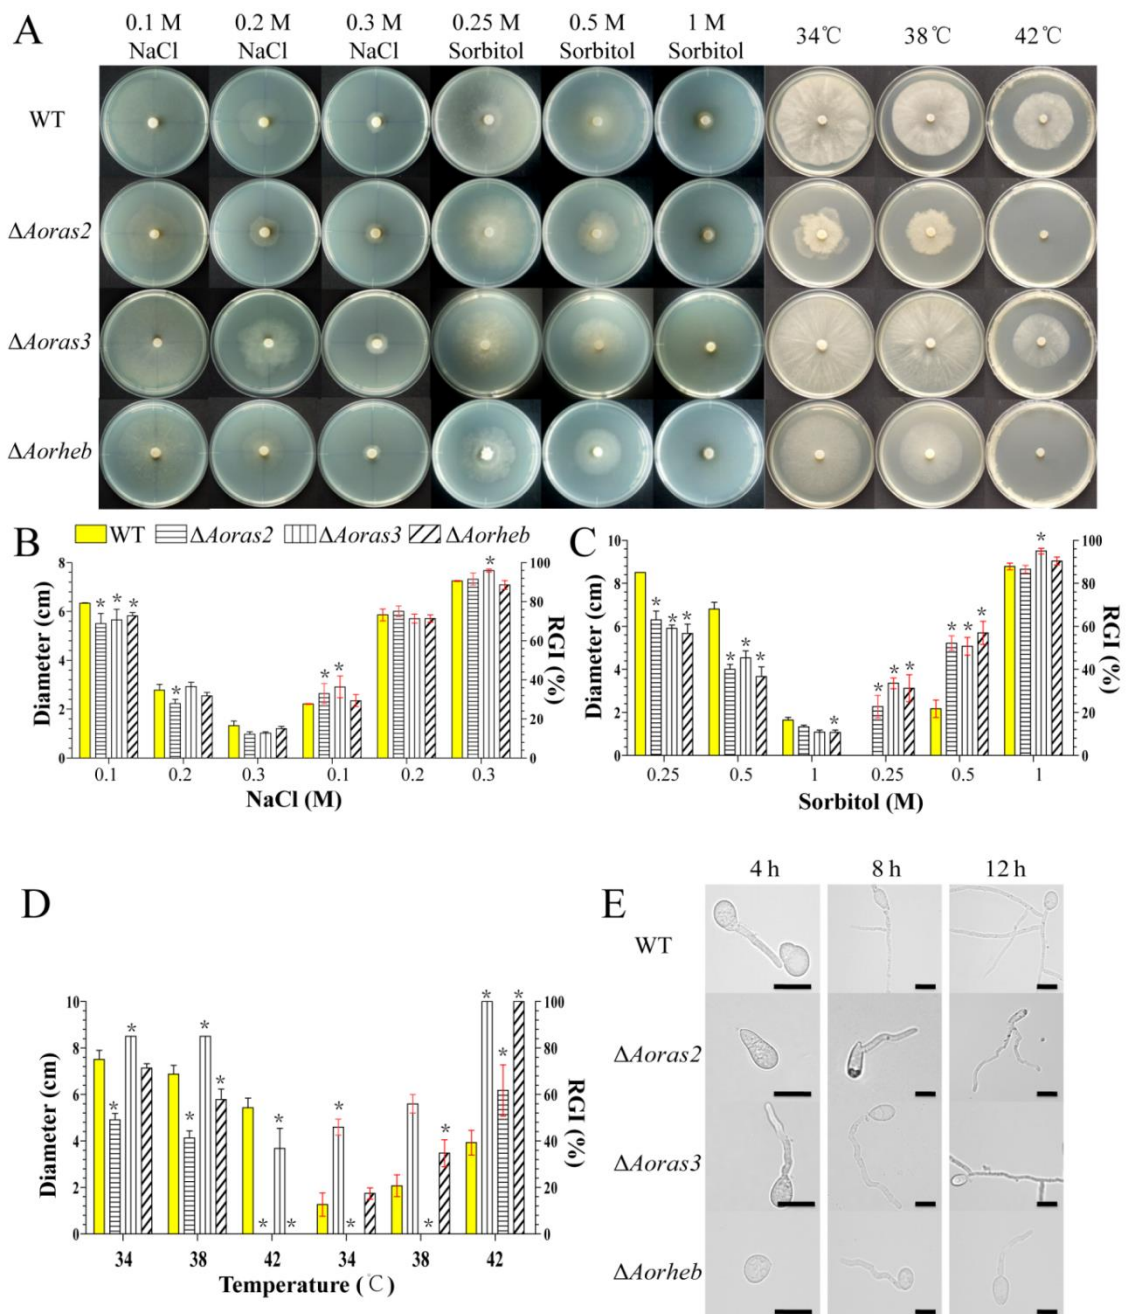

**Figure S3 Comparison of stress tolerance to osmotic agents, heat shock, and conidial germination. Related to Figure 3.**

(A) Colony morphologies of the WT and mutant strains under stress conditions such as osmotic agents and heat shock. (B–D) Colony diameters and the relative growth inhibition (RGI) values of the strains cultured in the presence of (B) 0.10–0.30 M NaCl, (C) 0.25–1 M sorbitol, (D) heat shock (34, 38, and 42 °C). Error bars: Data are represented as mean  $\pm$  SD. An asterisk in (B–D) indicates a significant difference between mutants and the WT strain ( $n = 3$  for the WT strain,  $n = 9$  for the each mutant strain; Tukey’s HSD,  $P < 0.05$ ). (E) Spore germination of the WT and mutant strains at different time points. Bar = 20  $\mu$ m.



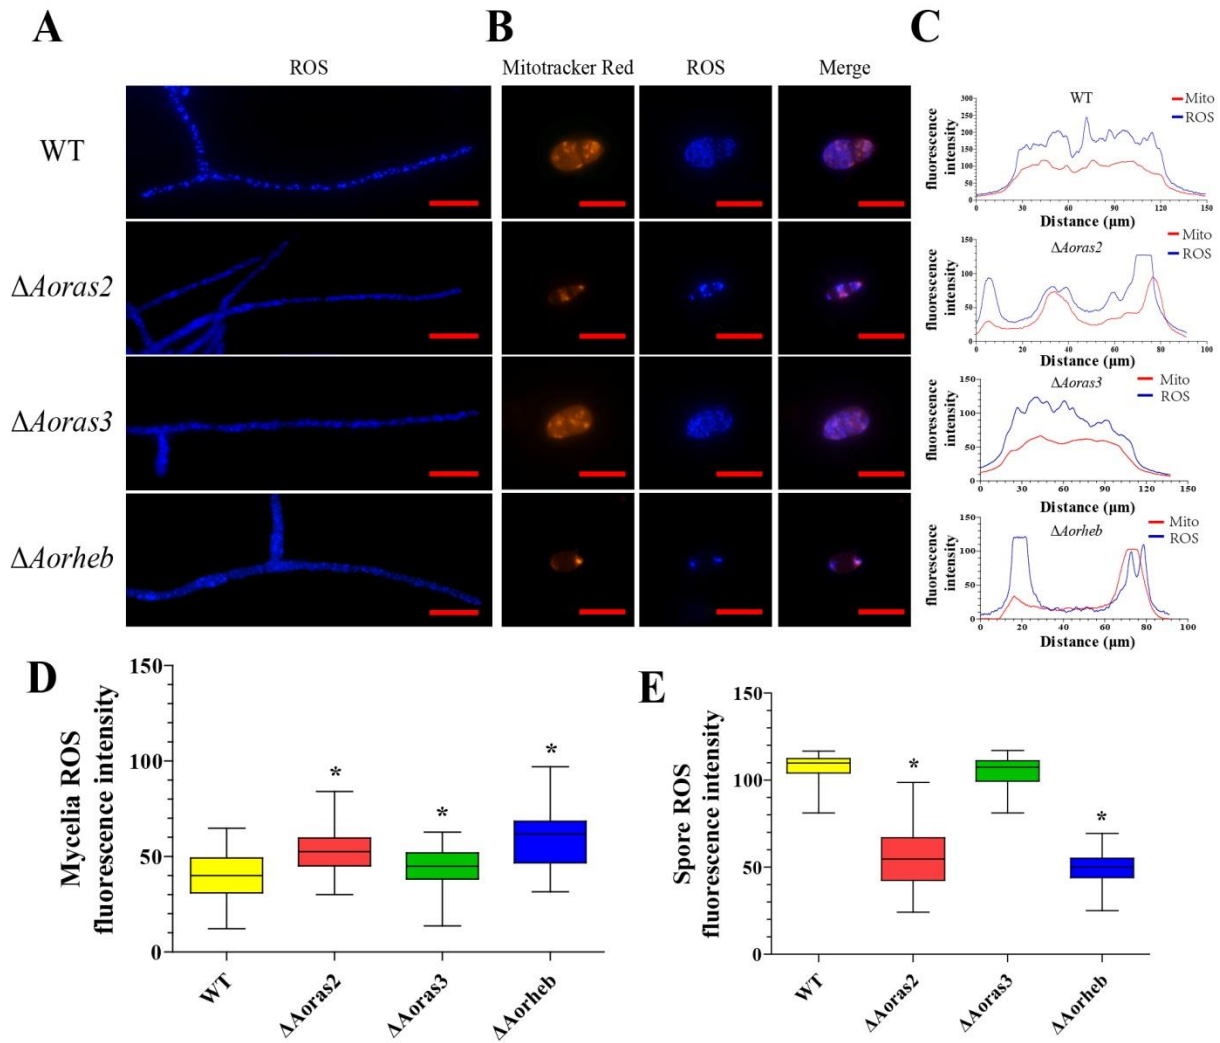

**Figure S5 Effect of AoRas2 and AoRheb on ROS levels in mycelia and spores. Related to Figure 10.**

(A) Mycelia and spores of the WT and mutants were stained with dihydroethidium (DHE). (B) Spores of the WT and mutants were stained with DHE and MitoTracker Red CMXRos. Samples (A) and (B) were examined under a confocal laser scanning microscope. Bar = 10  $\mu\text{m}$ . (C) The distribution of ROS and mitochondria in spores was observed through the co-localization of dyes using the ImageJ software. (D, E) The ROS content of WT and mutant strains in (D) hyphae and (E) spores was analyzed by estimating DHE fluorescence intensity values for at least 30 fields viewed under a microscope, and the horizontal bars depict the median. An asterisk in (D, E) indicates a significant difference between mutants and the WT strain ( $P < 0.05$ ).

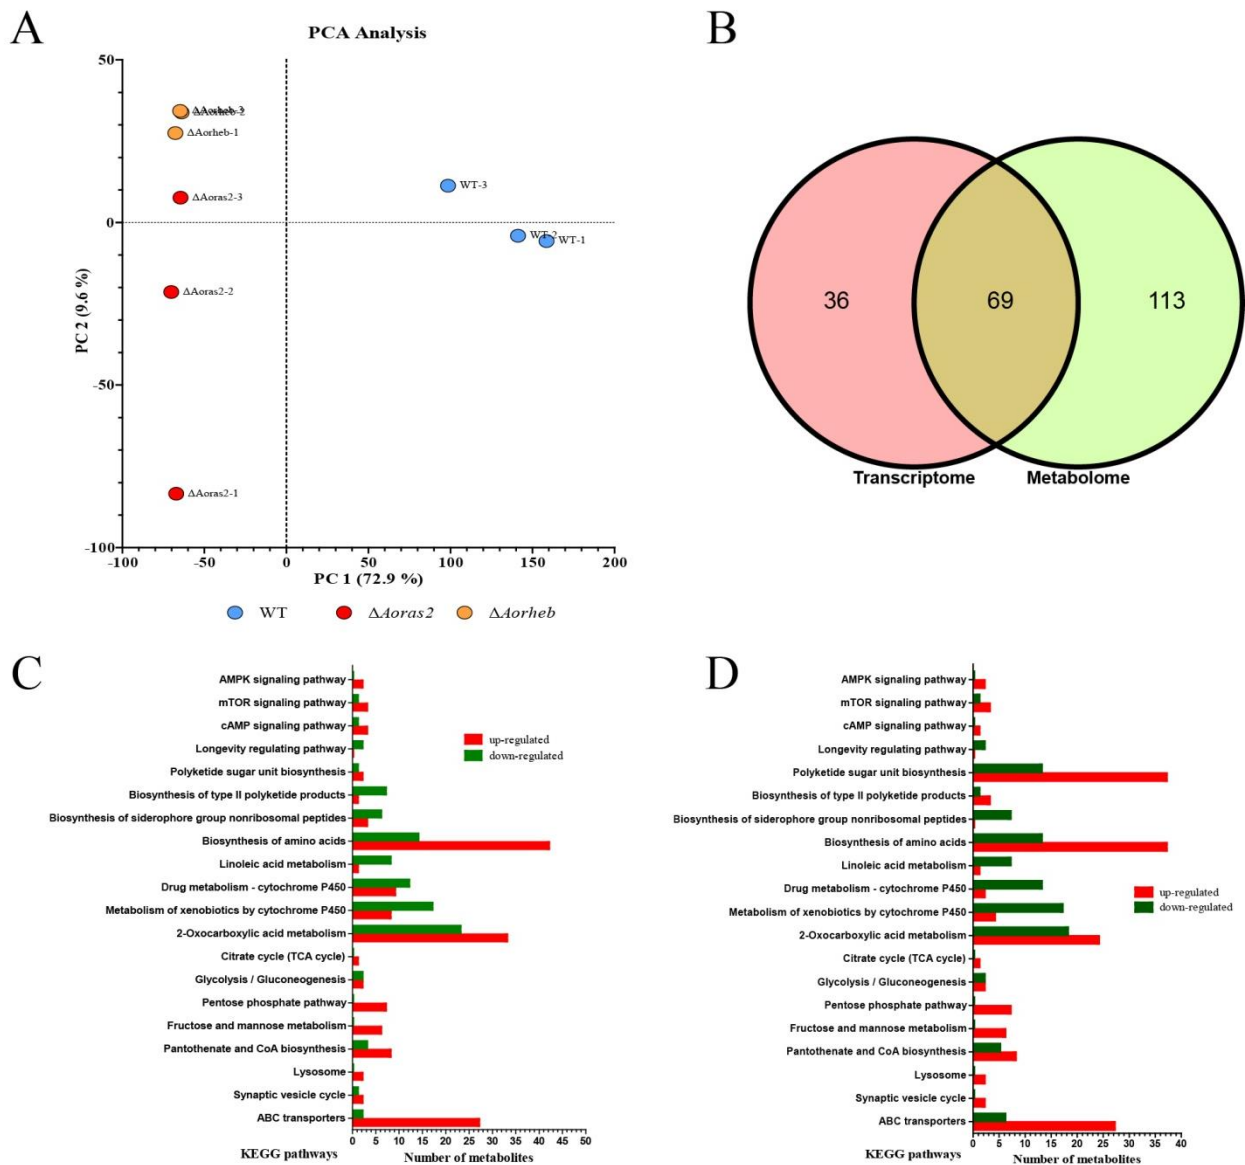

**Figure S6 Comparison of untargeted metabolome using principal component analysis and partial KEGG enrichment. Related to Figure 9.**

(A) PCA was used to analyze the metabolites of the WT and mutant strains ( $\Delta Aoras2$  and  $\Delta Aorheb$ ). Three biological samples were maintained for each strain. (B) Venn analysis of the KEGG pathways in the transcriptome and metabolome. There are 69 KEGG pathways common between transcriptome and metabolome. (C) Partial KEGG pathway enrichment of differentially expressed metabolites (DEMs) in the  $\Delta Aoras2$  mutant strain. (D) Partial KEGG pathway enrichment of DEMs in the  $\Delta Aorheb$  mutant.
